# Supplementary material
Source: Springer Nature journal article supplement (https://www.springermedizin.de/resource/supplementary/12889_2010_3036_MOESM1_ESM.pdf/9488068)
Supplement: MOESM1 [file 9488068]

Alerts & Messages

Your current active study has been changed successfully.

Instructions

If needed you may change the study/site or request access to a new study with a different role.

Info

Study: RNVMMG- Rede  
 Start Date: 07/01/2009  
 End Date: 06/30/2010

## OpenClinica: Managing Clinical Research Studies

As a Study Director for the current site: RNVMMG- Rede and Protocol ID: CNPq 402702/2008-5, you may access the following modules and perform available actions

### Actions Available

| Submit Data                                                                                                                                                                                              | Extract Data                                                                             | Manage Study                                                                                                                                                                                                                       | Business Admin                                                                                                                                       |
|----------------------------------------------------------------------------------------------------------------------------------------------------------------------------------------------------------|------------------------------------------------------------------------------------------|------------------------------------------------------------------------------------------------------------------------------------------------------------------------------------------------------------------------------------|------------------------------------------------------------------------------------------------------------------------------------------------------|
| <ul style="list-style-type: none"> <li>View All Subjects</li> <li>Add Subject</li> <li>Add New Study Event</li> <li>View Study Events</li> <li>Notes &amp; Discrepancies</li> <li>Import Data</li> </ul> | <ul style="list-style-type: none"> <li>View Dataset</li> <li>Extract Datasets</li> </ul> | <ul style="list-style-type: none"> <li>Manage Users</li> <li>Manage Subjects</li> <li>Manage Sites</li> <li>Manage Event Definitions</li> <li>Manage CRFs</li> <li>View Study Events</li> <li>Notes &amp; Discrepancies</li> </ul> | <ul style="list-style-type: none"> <li>Administer Users</li> <li>Administer Subjects</li> <li>Administer Studies</li> <li>Administer CRFs</li> </ul> |

Alerts & Messages

Instructions

Select any subject to view more details and to add or review subject data.

Info

Study: RNVMMG- Rede  
 Start Date: 07/01/2009  
 End Date: 06/30/2010  
 PI: Jose Guilherme Cecatti

## Manage All Subjects in RNVMMG- Rede

All Events Inclusion Outras inte...  
 Page 1 of 951 Find Show More Add New Subject

| Study Subject ID | Inclusão | Outras interações | Actions |
|------------------|----------|-------------------|---------|
| 255225537        |          |                   |         |
| 255225538        |          |                   |         |
| 255225539        | (2)      |                   |         |

## View Section Data Entry for Formulário de coleta de dados 1.1

CRF Info

Press the little flag icon beside an input to enter discrepancy notes, please note that you can only save the notes if CRF data entry has already started.

Exit

Ameaçad...(11/11) Near\_mi...(7/7) Desfecho (3/3) -- Select to Jump --

Title: Critérios de Near Miss Materno  
 Page: 8

**CRITÉRIOS DE NEAR MISS MATERNO**  
 CRITÉRIOS CLÍNICOS

56 A mulher apresentou alguns dos critérios clínicos de near miss?  1 sim  2 não  8 não consta no prontuário \*

57 Se SIM, indique quais:  1 cianose  2 gasping  3 FR>40 ou <6  4 choque \*
